# Supplementary material
Source: PubMed Central journal article supplement (PMC9113854)

**Appendix 1.** Radiographic measures used in assessment of Hallux Valgus deformity. (A) 1st and 2nd Intermetatarsal Angle (B) Hallux Valgus Angle (C) Distal Metatarsal Articular Angle

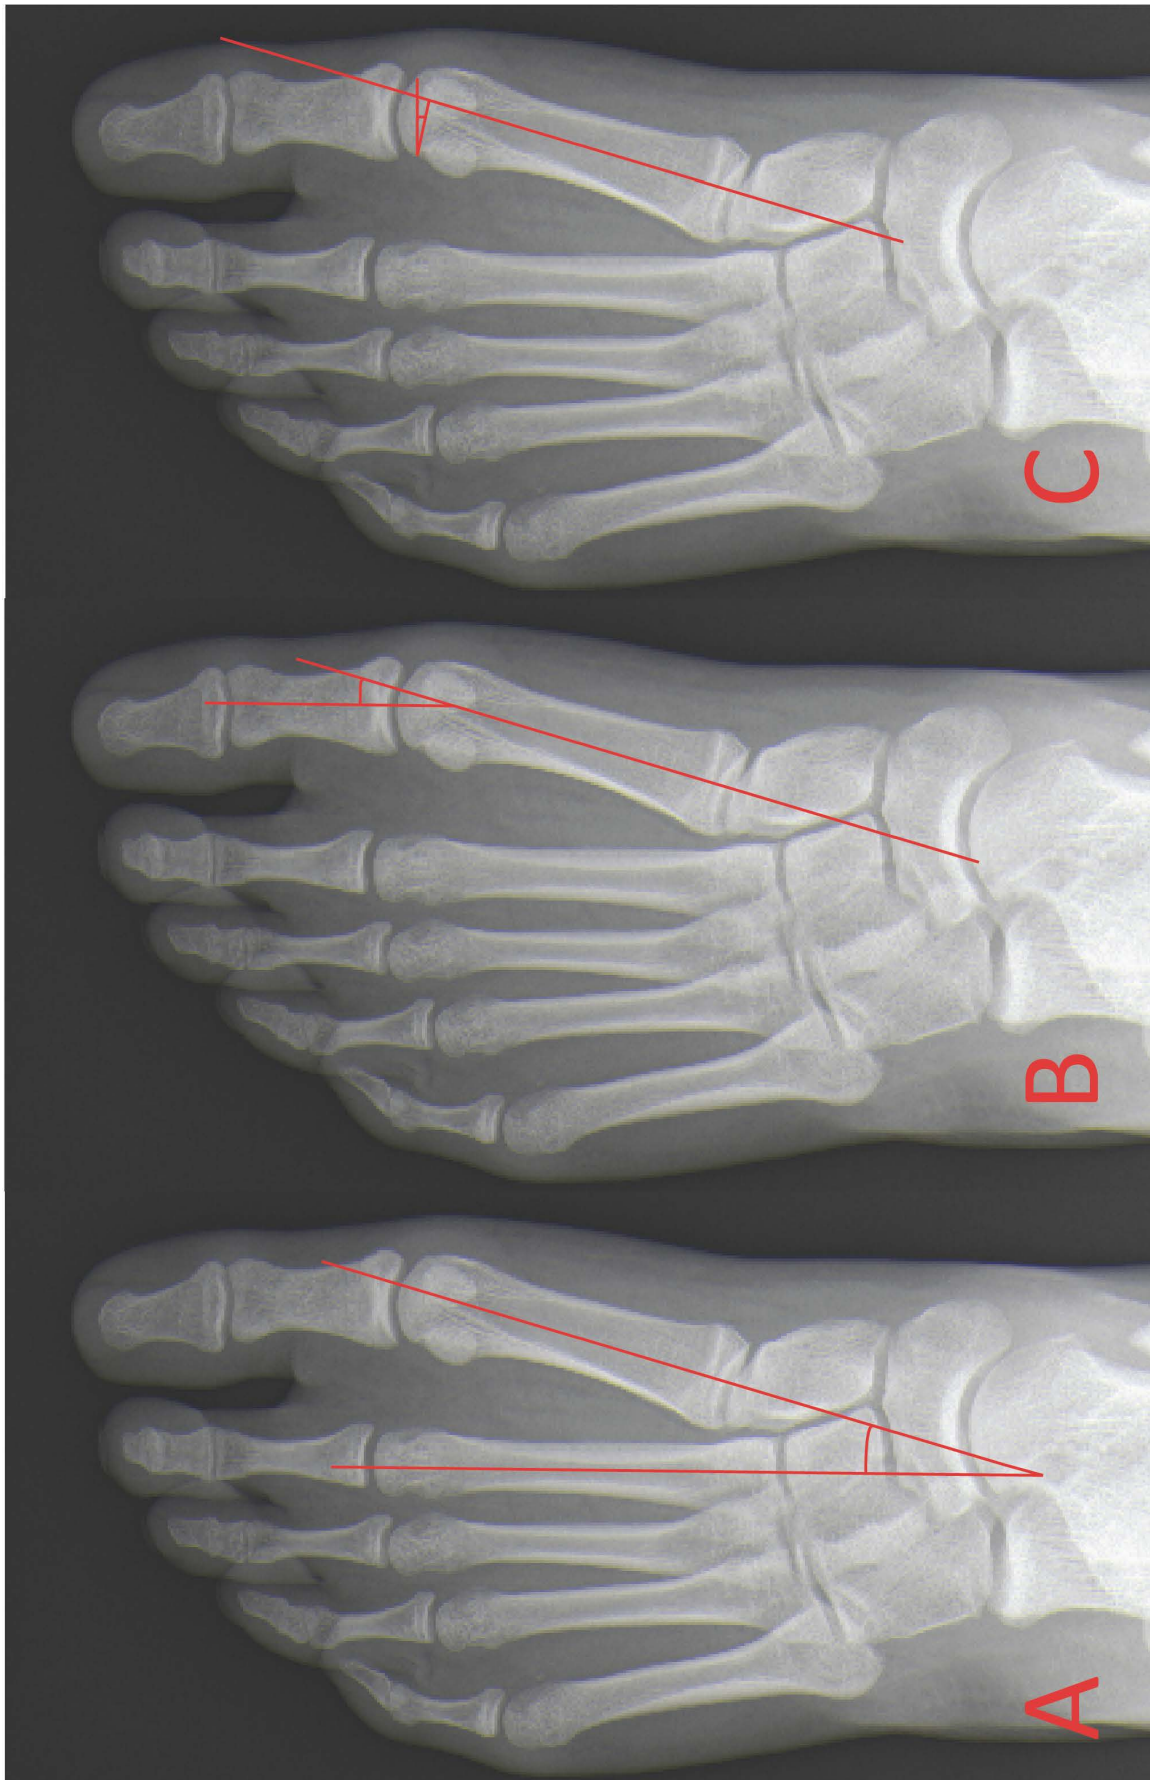

Supplement: pxab074_suppl_supplementary_appendix_1.pdf [file pxab074_suppl_supplementary_appendix_1.pdf]
