# Supplementary material
Source: PubMed Central journal article supplement (PMC9113854)

**Appendix 2.** Radiographic progression of PVH in a patient with Marfan's Syndrome over 5 years from image A to C. Images D-E show progression of clinical examination of Marfan's patient with severe PVH.

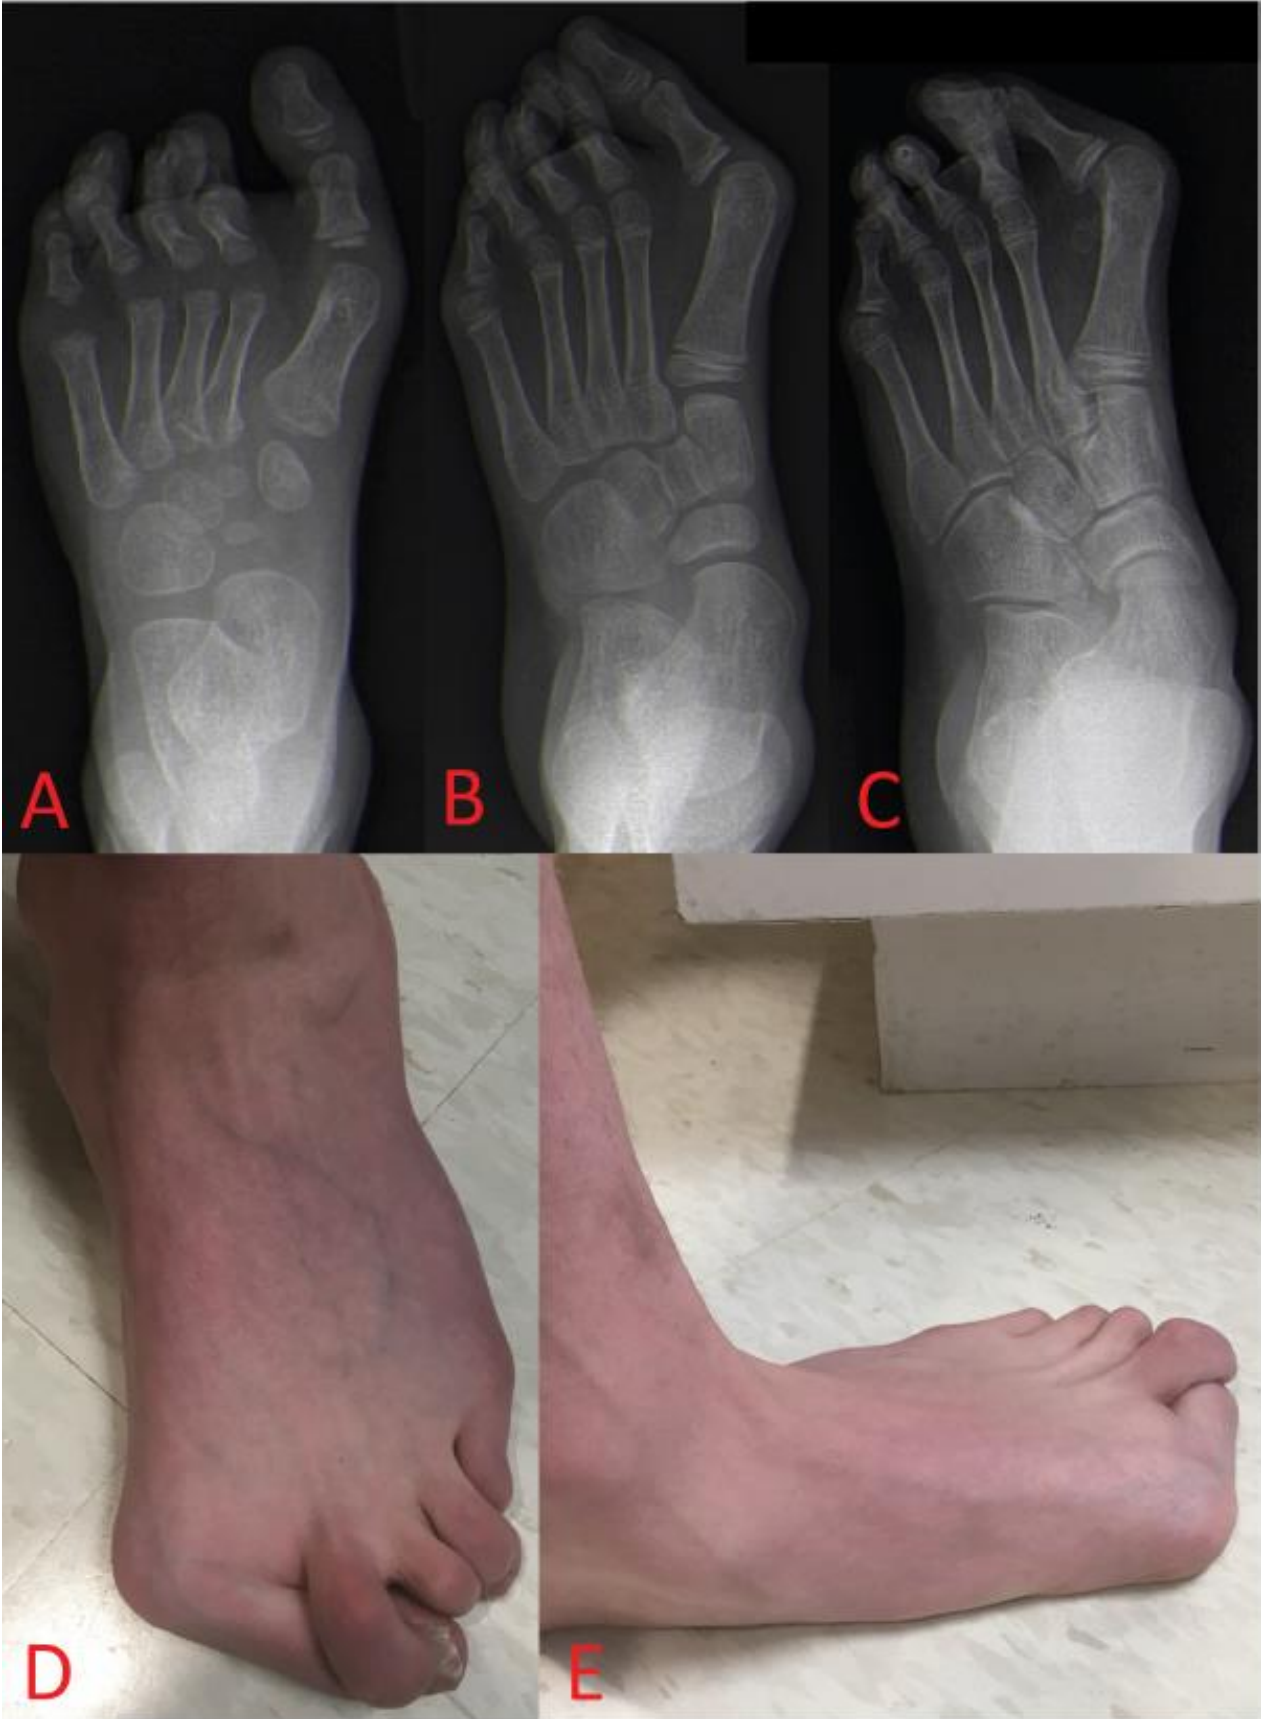

Supplement: pxab074_suppl_supplementary_appendix_2.pdf [file pxab074_suppl_supplementary_appendix_2.pdf]
